# Supplementary material
Source: publisher figshare collection journal article supplement (https://tandf.figshare.com/ndownloader/files/38303773)
Supplement: Supplementary file 1 [file 38303773]

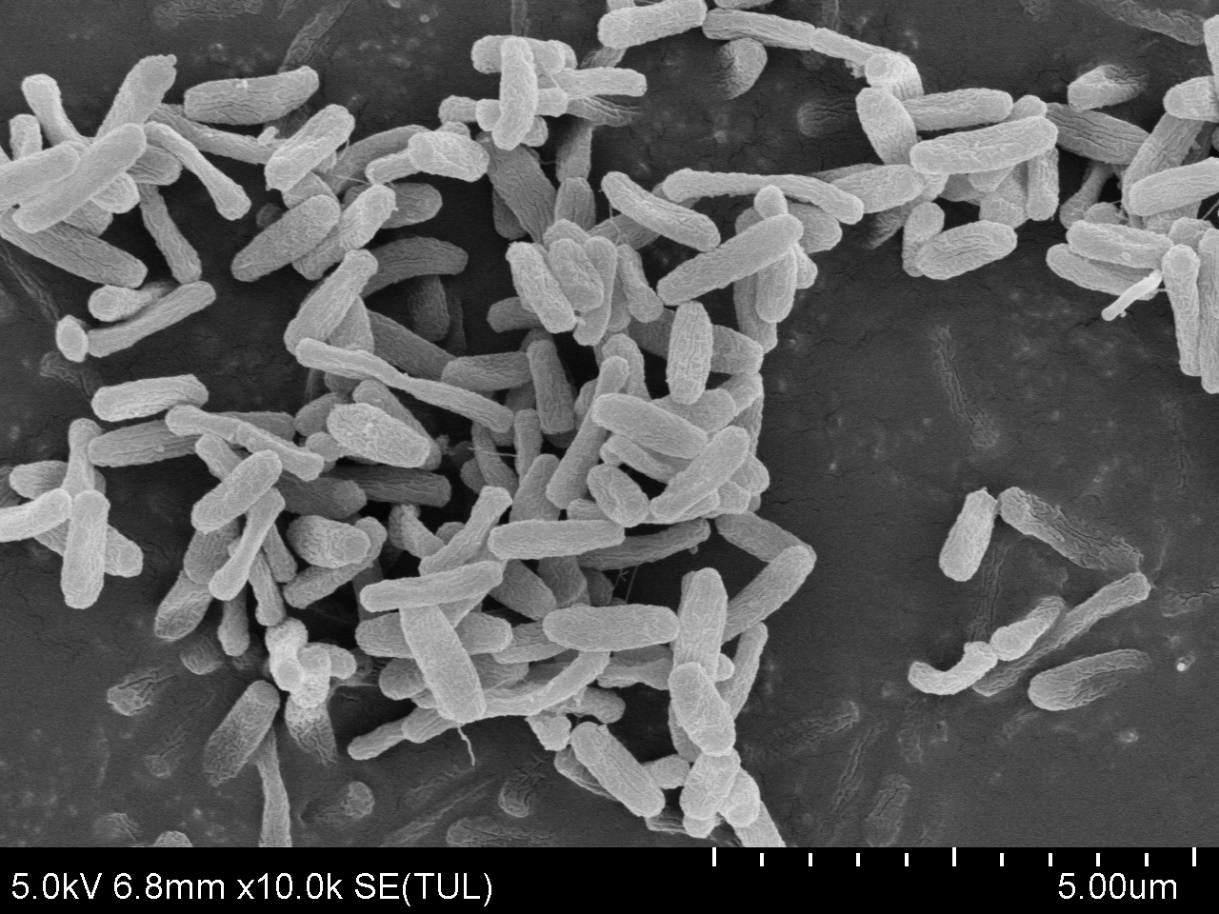


Figure S1 The scanning electronic microscope photographs of LW2 cells.


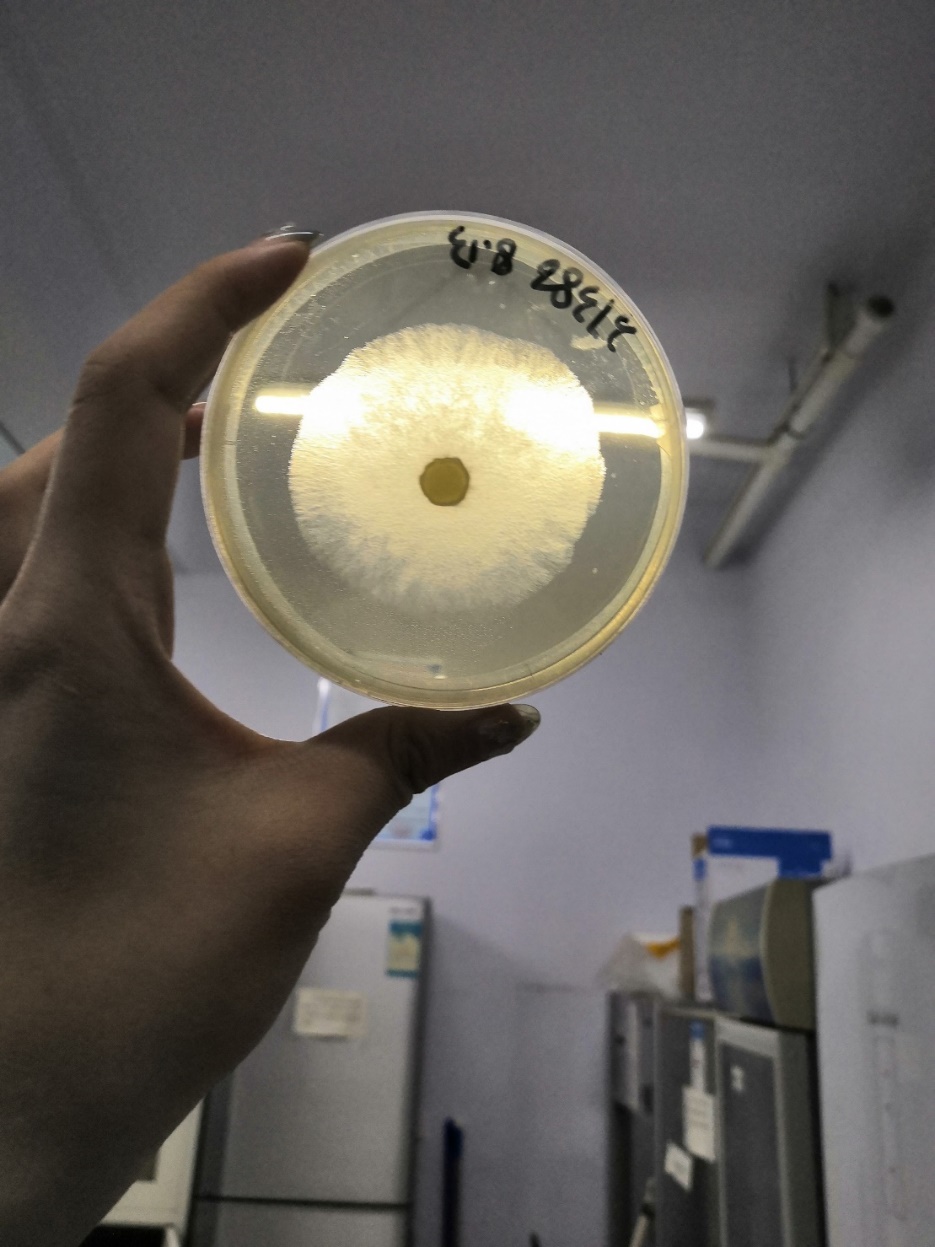

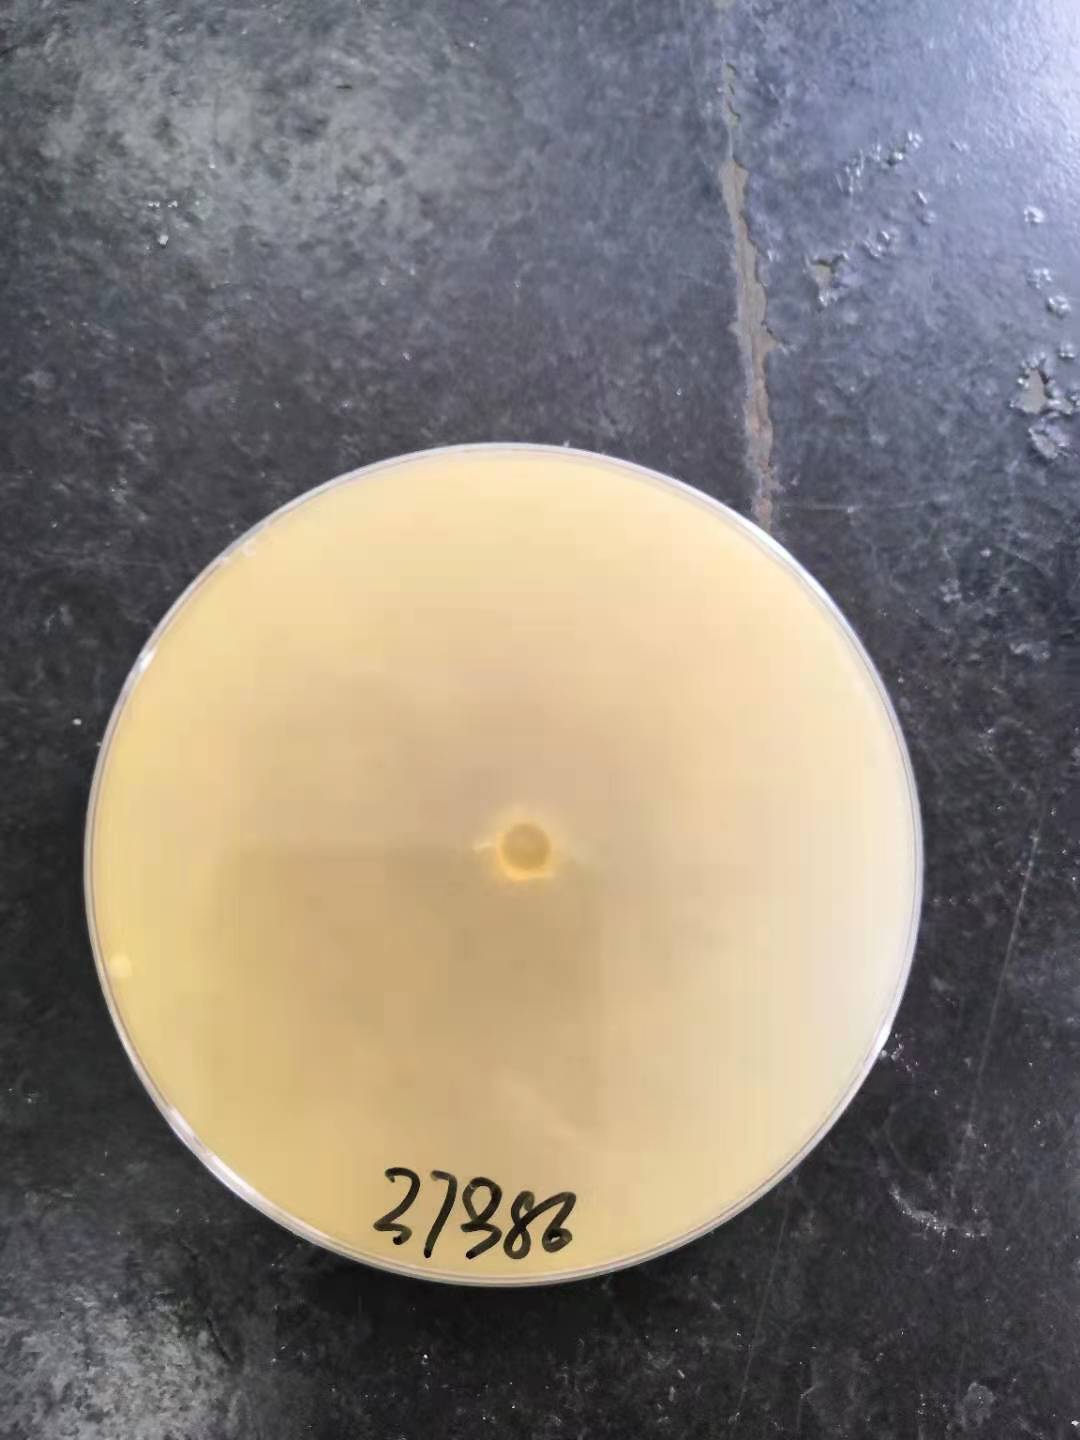


Figure S2. Growth of *Pythium ultimum* in 3 and 5 days


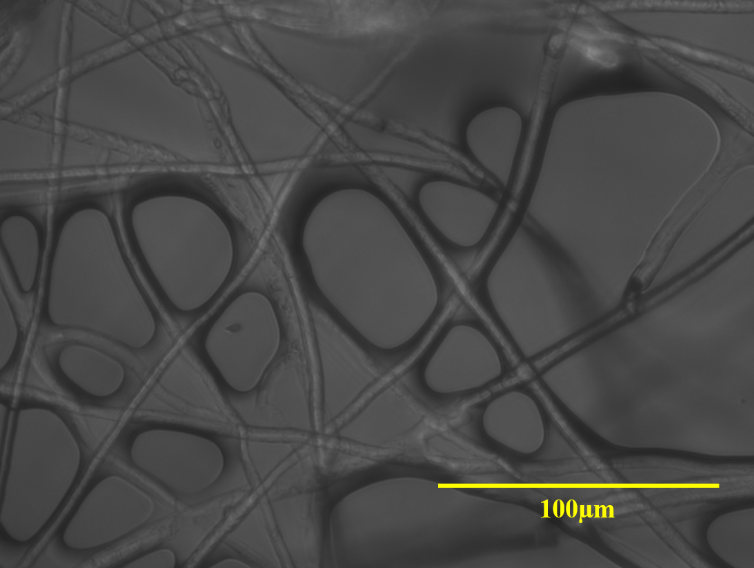


Figure S3 Micrograph of *Pythium ultimum* hyphae (bar 100 μm).


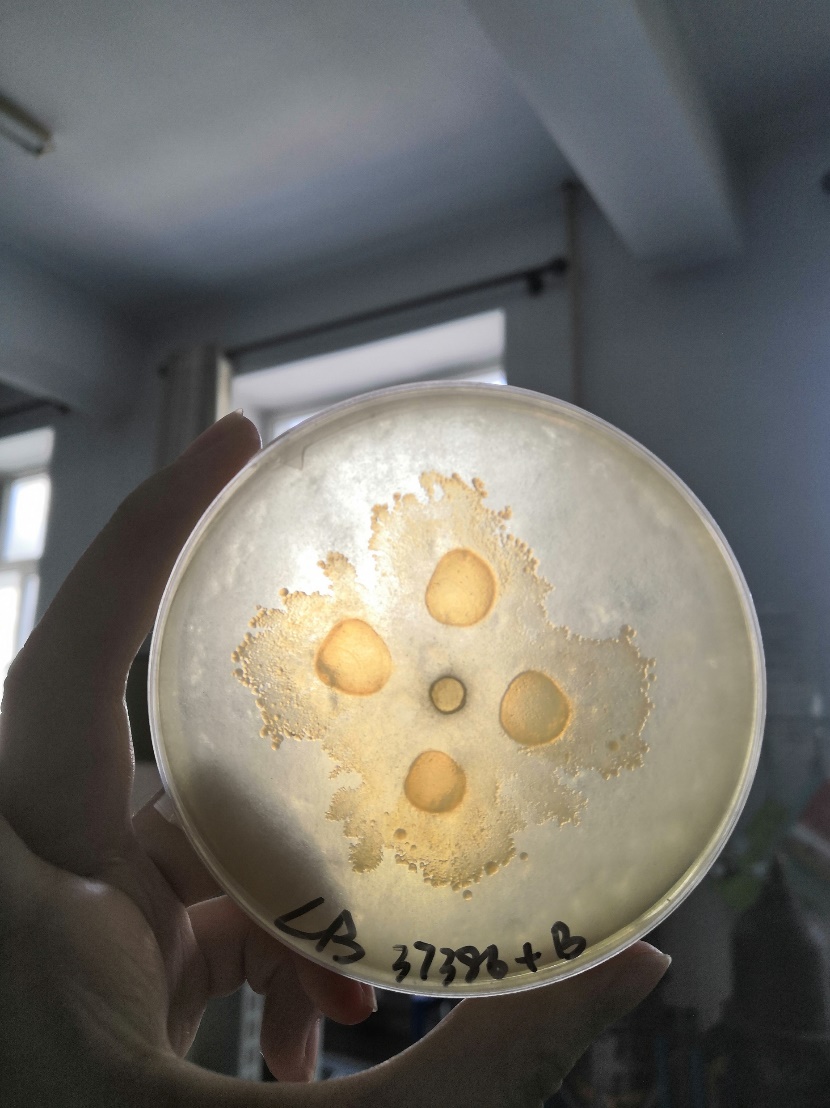


Figure S4. The picture of LW2 and *Pythium ultimum* coexisting for 15 days in the mutual inhibition experiment
